# Supplementary material for: Sex differences in the association between socioeconomic status and diabetes prevalence and incidence in China: cross-sectional and prospective studies of 0.5 million adults
Source: PubMed Central journal article supplement (PMC6647183; doi:10.1007/s00125-019-4896-z), 2019-05-31
Supplement: 125_2019_4896_MOESM1_ESM.pdf [file 125_2019_4896_MOESM1_ESM.pdf]

**ESM Table 1. Sex specific characteristics of CKB participants included for cross-sectional analyses by educational level**

| Variable                                   | Highest educational level attained |                             |                                     |                               |                               |                             |                                     |                               |
|--------------------------------------------|------------------------------------|-----------------------------|-------------------------------------|-------------------------------|-------------------------------|-----------------------------|-------------------------------------|-------------------------------|
|                                            | Men (n=209352)                     |                             |                                     |                               | Women (n=300867)              |                             |                                     |                               |
|                                            | No formal school<br>(n=18529)      | Primary school<br>(n=69769) | Middle or high school<br>(n=104569) | College or above<br>(n=16485) | No formal school<br>(n=75834) | Primary school<br>(n=94571) | Middle or high school<br>(n=117037) | College or above<br>(n=13425) |
| Age, years                                 | 60.3 (9.9)                         | 55.9 (10.1)                 | 48.8 (9.8)                          | 50.8 (12.3)                   | 56.8 (10.1)                   | 51.8 (10.2)                 | 46.8 (8.8)                          | 46.7 (10.4)                   |
| Urban residence, <i>n</i> (%)              | 3576 (19.3)                        | 17882 (25.6)                | 55058 (52.7)                        | 14420 (87.5)                  | 22989 (30.3)                  | 27116 (28.7)                | 71455 (61.1)                        | 12353 (92.0)                  |
| Geographic area, <i>n</i> (%)              |                                    |                             |                                     |                               |                               |                             |                                     |                               |
| Eastern                                    | 9483 (51.2)                        | 23220 (33.3)                | 34938 (33.4)                        | 4890 (29.7)                   | 37921 (50.0)                  | 26628 (28.2)                | 34946 (29.9)                        | 3197 (23.8)                   |
| Northeastern                               | 310 (1.7)                          | 1757 (2.5)                  | 14671 (14.0)                        | 6432 (39.0)                   | 2077 (2.7)                    | 3966 (4.2)                  | 21586 (18.4)                        | 6535 (48.7)                   |
| Central                                    | 1834 (9.9)                         | 23619 (33.9)                | 27708 (26.5)                        | 877 (5.3)                     | 9432 (12.4)                   | 33748 (35.7)                | 25158 (21.5)                        | 419 (3.1)                     |
| Western                                    | 6902 (37.2)                        | 21173 (30.3)                | 27252 (26.1)                        | 4286 (26.0)                   | 26404 (34.8)                  | 30229 (32.0)                | 35347 (30.2)                        | 3274 (24.4)                   |
| Household income (yuan/year), <i>n</i> (%) |                                    |                             |                                     |                               |                               |                             |                                     |                               |
| <10,000                                    | 8805 (47.5)                        | 24475 (35.1)                | 20711 (19.8)                        | 395 (2.4)                     | 33431 (44.1)                  | 32203 (34.1)                | 23518 (20.1)                        | 285 (2.1)                     |
| 10,000-19,999                              | 3529 (19.0)                        | 19974 (28.6)                | 33507 (32.0)                        | 2325 (14.1)                   | 16863 (22.2)                  | 30735 (32.5)                | 39664 (33.9)                        | 1697 (12.6)                   |
| 20,000-34,999                              | 3534 (19.1)                        | 14756 (21.1)                | 29664 (28.4)                        | 5275 (32.0)                   | 14508 (19.1)                  | 20512 (21.7)                | 33381 (28.5)                        | 4510 (33.6)                   |
| ≥35,000                                    | 2661 (14.4)                        | 10564 (15.1)                | 20687 (19.8)                        | 8490 (51.5)                   | 11032 (14.5)                  | 11121 (11.8)                | 20474 (17.5)                        | 6933 (51.6)                   |
| Regular alcohol consumption, <i>n</i> (%)  | 6470 (34.9)                        | 29160 (41.8)                | 49536 (47.7)                        | 7976 (48.4)                   | 2103 (2.8)                    | 3350 (3.5)                  | 5090 (4.3)                          | 1195 (8.9)                    |
| Regular smoking, <i>n</i> (%)              |                                    |                             |                                     |                               |                               |                             |                                     |                               |
| Active                                     | 11939 (64.4)                       | 45200 (64.8)                | 64103 (61.3)                        | 6620 (40.2)                   | 2350 (3.1)                    | 2881 (3.0)                  | 1771 (1.5)                          | 101 (0.75)                    |
| Passive                                    | 8654 (46.7)                        | 39002 (55.9)                | 61270 (58.6)                        | 7757 (47.1)                   | 35008 (46.2)                  | 53180 (56.2)                | 63122 (53.9)                        | 5640 (42.0)                   |
| Regular consumption of foods, <i>n</i> (%) |                                    |                             |                                     |                               |                               |                             |                                     |                               |
| Fresh fruit                                | 2204 (11.9)                        | 9734 (14.0)                 | 27623 (26.4)                        | 8676 (52.6)                   | 11671 (15.4)                  | 19844 (21.0)                | 53624 (45.8)                        | 10554 (78.6)                  |
| Fresh vegetable                            | 17683 (95.4)                       | 68612 (98.3)                | 103070 (98.6)                       | 16361 (99.2)                  | 73113 (96.4)                  | 93316 (98.7)                | 116065 (99.2)                       | 13352 (99.5)                  |

|                                          |              |              |              |              |  |              |              |              |              |
|------------------------------------------|--------------|--------------|--------------|--------------|--|--------------|--------------|--------------|--------------|
| Fish                                     | 914 (4.9)    | 4450 (6.4)   | 11787 (11.3) | 2669 (16.2)  |  | 4797 (6.3)   | 6119 (6.5)   | 12778 (10.9) | 1805 (13.4)  |
| Prior diseases, <i>n</i> (%)             |              |              |              |              |  |              |              |              |              |
| CHD                                      | 376 (2.0)    | 1807 (2.6)   | 2575 (2.5)   | 925 (5.6)    |  | 1994 (2.6)   | 3108 (3.3)   | 3820 (3.3)   | 732 (5.5)    |
| Stroke or TIA                            | 465 (2.5)    | 1671 (2.4)   | 2230 (2.1)   | 507 (3.1)    |  | 1030 (1.4)   | 1347 (1.4)   | 1364 (1.2)   | 185 (1.4)    |
| Cancer                                   | 98 (0.53)    | 385 (0.55)   | 383 (0.37)   | 97 (0.59)    |  | 348 (0.46)   | 519 (0.55)   | 615 (0.53)   | 117 (0.87)   |
| Family history of diabetes, <i>n</i> (%) | 239 (1.3)    | 1512 (2.2)   | 6646 (6.4)   | 1497 (9.1)   |  | 1298 (1.7)   | 2655 (2.8)   | 9312 (8.0)   | 1865 (13.9)  |
| BMI (kg/m <sup>2</sup> )                 |              |              |              |              |  |              |              |              |              |
| Mean                                     | 22.3 (3.0)   | 22.9 (3.1)   | 23.8 (3.2)   | 24.7 (3.1)   |  | 23.7 (3.5)   | 23.9 (3.5)   | 23.9 (3.3)   | 23.3 (3.1)   |
| <24 (normal), <i>n</i> (%)               | 13571 (73.2) | 46172 (66.2) | 55788 (53.4) | 6612 (40.1)  |  | 42260 (55.7) | 50864 (53.8) | 63204 (54.0) | 8315 (61.9)  |
| 24-28 (overweight), <i>n</i> (%)         | 4158 (22.4)  | 19200 (27.5) | 37714 (36.1) | 7556 (45.8)  |  | 24695 (32.6) | 31906 (33.7) | 40273 (34.4) | 4053 (30.2)  |
| ≥28 (obese), <i>n</i> (%)                | 800 (4.3)    | 4397 (6.3)   | 11067 (10.6) | 2317 (14.1)  |  | 8879 (11.7)  | 11801 (12.5) | 13560 (11.6) | 1057 (7.9)   |
| Physical activity, Met-hr/day            | 23.7 (16.3)  | 22.2 (16.0)  | 22.6 (15.1)  | 15.6 (9.2)   |  | 21.9 (13.7)  | 20.2 (12.9)  | 20.0 (12.3)  | 17.9 (8.0)   |
| Systolic blood pressure, mm Hg           | 138.5 (22.5) | 134.7 (20.8) | 131.0 (18.9) | 130.0 (18.3) |  | 137.8 (23.4) | 132.0 (21.7) | 124.3 (19.2) | 117.8 (18.1) |
| Diastolic blood pressure, mm Hg          | 79.8 (11.5)  | 78.9 (11.3)  | 79.3 (11.4)  | 79.0 (11.0)  |  | 78.5 (11.1)  | 77.2 (10.8)  | 75.7 (10.6)  | 73.1 (10.2)  |
| Waist circumference, cm                  | 78.0 (9.2)   | 80.0 (9.5)   | 83.4 (9.6)   | 86.6 (8.9)   |  | 79.6 (10.1)  | 79.7 (9.7)   | 78.5 (8.9)   | 76.7 (8.3)   |
| Fat, %                                   | 19.4 (6.0)   | 20.8 (6.0)   | 22.9 (6.1)   | 24.2 (5.7)   |  | 31.7 (7.5)   | 32.4 (7.3)   | 32.2 (6.7)   | 31.0 (6.2)   |

Values are shown as *n* (%) or mean (SD).

**ESM Table 2. Sex specific characteristics of CKB participants included for cross-sectional analyses by household income**

| Variable                                   | Household income (yuan/year) |                          |                          |                     |                     |                          |                          |                     |
|--------------------------------------------|------------------------------|--------------------------|--------------------------|---------------------|---------------------|--------------------------|--------------------------|---------------------|
|                                            | Men (n=209352)               |                          |                          |                     | Women (n=300867)    |                          |                          |                     |
|                                            | <10000<br>(n=54386)          | 10000-19999<br>(n=95335) | 20000-34999<br>(n=53229) | ≥35000<br>(n=42402) | <10000<br>(n=89437) | 10000-19999<br>(n=88959) | 20000-34999<br>(n=72911) | ≥35000<br>(n=49560) |
| Age, years                                 | 54.3 (11.4)                  | 52.3 (10.9)              | 51.5 (10.5)              | 50.9 (10.4)         | 52.1 (11.4)         | 50.7 (10.3)              | 50.2 (9.8)               | 50.3 (9.8)          |
| Urban residence, <i>n</i> (%)              | 9667 (17.8)                  | 25099 (42.3)             | 29982 (56.3)             | 26188 (61.8)        | 20785 (23.2)        | 40652 (45.7)             | 41616 (57.1)             | 30860 (62.3)        |
| Geographic area, <i>n</i> (%)              |                              |                          |                          |                     |                     |                          |                          |                     |
| Eastern                                    | 6817 (12.5)                  | 14126 (23.8)             | 25842 (48.5)             | 25746 (60.7)        | 12715 (14.2)        | 22380 (25.2)             | 36401 (49.9)             | 31196 (62.9)        |
| Northeastern                               | 2140 (3.9)                   | 7589 (12.8)              | 7651 (14.4)              | 5790 (13.7)         | 5134 (5.7)          | 11671 (13.1)             | 10286 (14.1)             | 7073 (14.3)         |
| Central                                    | 15990 (29.4)                 | 20728 (34.9)             | 11748 (22.1)             | 5572 (13.1)         | 19976 (22.3)        | 28145 (31.6)             | 14898 (20.4)             | 5738 (11.6)         |
| Western                                    | 29439 (54.1)                 | 16892 (28.5)             | 7988 (15.0)              | 5294 (12.5)         | 51612 (57.7)        | 26763 (30.1)             | 11326 (15.5)             | 5553 (11.2)         |
| Highest educational level, <i>n</i> (%)    |                              |                          |                          |                     |                     |                          |                          |                     |
| No formal school                           | 8805 (16.2)                  | 3529 (5.9)               | 3534 (6.6)               | 2661 (6.3)          | 33431 (37.4)        | 16863 (19.0)             | 14508 (19.9)             | 11032 (22.3)        |
| Primary school                             | 24475 (45.0)                 | 19974 (33.7)             | 14756 (27.7)             | 10564 (24.9)        | 32203 (36.0)        | 30735 (34.5)             | 20512 (28.1)             | 11121 (22.4)        |
| Middle or high school                      | 20711 (38.1)                 | 33507 (56.5)             | 29664 (55.7)             | 20687 (48.8)        | 23518 (26.3)        | 39664 (44.6)             | 33381 (45.8)             | 20474 (41.3)        |
| College or above                           | 395 (0.73)                   | 2325 (3.9)               | 5275 (9.9)               | 8490 (20.0)         | 285 (0.32)          | 1697 (1.9)               | 4510 (6.2)               | 6933 (14.0)         |
| Regular alcohol consumption, <i>n</i> (%)  | 19831 (36.5)                 | 26617 (44.9)             | 25589 (48.1)             | 21105 (49.8)        | 3431 (3.8)          | 3236 (3.6)               | 2820 (3.9)               | 2251 (4.5)          |
| Regular smoking, <i>n</i> (%)              |                              |                          |                          |                     |                     |                          |                          |                     |
| Active                                     | 35132 (64.6)                 | 35703 (60.2)             | 31827 (59.8)             | 25200 (59.4)        | 3547 (4.0)          | 2076 (2.3)               | 964 (1.3)                | 516 (1.0)           |
| Passive                                    | 27528 (50.6)                 | 33220 (56.0)             | 30571 (57.4)             | 25364 (59.8)        | 47484 (53.1)        | 47900 (53.8)             | 37112 (50.9)             | 24454 (49.3)        |
| Regular consumption of foods, <i>n</i> (%) |                              |                          |                          |                     |                     |                          |                          |                     |
| Fresh fruit                                | 6195 (11.4)                  | 12532 (21.1)             | 15087 (28.3)             | 14423 (34.0)        | 14836 (16.6)        | 27977 (31.4)             | 29203 (40.1)             | 23677 (47.8)        |
| Fresh vegetable                            | 52195 (96.0)                 | 58642 (98.8)             | 52794 (99.2)             | 42095 (99.3)        | 85899 (96.0)        | 88201 (99.1)             | 72431 (99.3)             | 49315 (99.5)        |
| Fish                                       | 1910 (3.5)                   | 4497 (7.6)               | 6288 (11.8)              | 7125 (16.8)         | 3335 (3.7)          | 6577 (7.4)               | 7688 (10.5)              | 7899 (15.9)         |

|                                          |              |              |              |              |  |              |              |              |              |
|------------------------------------------|--------------|--------------|--------------|--------------|--|--------------|--------------|--------------|--------------|
| Prior diseases, <i>n</i> (%)             |              |              |              |              |  |              |              |              |              |
| CHD                                      | 1088 (2.0)   | 1826 (3.1)   | 1615 (3.0)   | 1154 (2.7)   |  | 2367 (2.6)   | 3235 (3.6)   | 2453 (3.4)   | 1599 (3.2)   |
| Stroke or TIA                            | 1403 (2.6)   | 1583 (2.7)   | 1155 (2.2)   | 732 (1.7)    |  | 1208 (1.4)   | 1326 (1.5)   | 855 (1.2)    | 537 (1.1)    |
| Cancer                                   | 295 (0.54)   | 262 (0.44)   | 220 (0.41)   | 186 (0.44)   |  | 444 (0.50)   | 508 (0.57)   | 405 (0.56)   | 242 (0.49)   |
| Family history of diabetes, <i>n</i> (%) | 1432 (2.6)   | 2740 (4.6)   | 3089 (5.8)   | 2633 (6.2)   |  | 2574 (2.9)   | 4527 (5.1)   | 4573 (6.3)   | 3456 (7.0)   |
| BMI (kg/m <sup>2</sup> )                 |              |              |              |              |  |              |              |              |              |
| Mean                                     | 22.5 (3.1)   | 23.4 (3.2)   | 23.8 (3.2)   | 24.2 (3.2)   |  | 23.6 (3.5)   | 24.0 (3.5)   | 23.8 (3.4)   | 23.8 (3.3)   |
| <24 (normal), <i>n</i> (%)               | 38331 (70.5) | 34774 (58.6) | 28559 (53.7) | 20479 (48.3) |  | 50967 (57.0) | 46686 (52.5) | 39977 (54.8) | 27013 (54.5) |
| 24-28 (overweight), <i>n</i> (%)         | 13239 (2.3)  | 19174 (32.3) | 19291 (36.2) | 16924 (39.9) |  | 28368 (31.7) | 30649 (34.5) | 24772 (34.0) | 17138 (34.6) |
| ≥28 (obese), <i>n</i> (%)                | 2816 (5.2)   | 5387 (9.1)   | 5379 (10.1)  | 4999 (11.8)  |  | 10102 (11.3) | 11624 (13.1) | 8162 (11.2)  | 5409 (10.9)  |
| Physical activity, Met-hr/day            | 21.8 (16.1)  | 21.2 (15.6)  | 23.0 (14.8)  | 22.4 (14.2)  |  | 20.4 (12.4)  | 19.0 (12.2)  | 21.5 (13.4)  | 21.6 (13.1)  |
| Systolic blood pressure, mm Hg           | 133.6 (21.3) | 132.4 (19.9) | 132.7 (19.5) | 132.4 (19.0) |  | 132.0 (22.9) | 129.4 (21.8) | 129.0 (21.3) | 128.1 (20.9) |
| Diastolic blood pressure, mm Hg          | 78.5 (11.4)  | 78.8 (11.4)  | 79.6 (11.3)  | 80.1 (11.1)  |  | 76.9 (11.2)  | 76.6 (10.9)  | 76.8 (10.7)  | 76.6 (10.5)  |
| Waist circumference, cm                  | 79.3 (9.1)   | 82.1 (9.8)   | 83.0 (9.8)   | 84.1 (9.7)   |  | 78.9 (9.7)   | 79.5 (9.7)   | 78.8 (92.5)  | 78.8 (89.2)  |
| Fat, %                                   | 20.1 (6.0)   | 21.9 (6.1)   | 22.7 (6.1)   | 23.6 (6.1)   |  | 31.7 (7.3)   | 32.5 (7.1)   | 32.1 (6.9)   | 32.2 (6.7)   |

Values are shown as *n* (%) or mean (SD).

**ESM Table 3. Adjusted ORs and 95% CIs for baseline prevalent diabetes associated with educational level in men and women**

| Educational level                               | Model 1           |         | Model 2           |         | Model 3           |         |
|-------------------------------------------------|-------------------|---------|-------------------|---------|-------------------|---------|
|                                                 | OR (95% CI)       | p       | OR (95% CI)       | p       | OR (95% CI)       | p       |
| Men                                             |                   |         |                   |         |                   |         |
| No formal school                                | 1                 |         | 1                 |         | 1                 |         |
| Primary school                                  | 1.26 (1.17, 1.37) | <0.0001 | 1.21 (1.12, 1.31) | <0.0001 | 1.19 (1.10, 1.29) | <0.0001 |
| Middle and high school                          | 1.38 (1.27, 1.51) | <0.0001 | 1.31 (1.20, 1.42) | <0.0001 | 1.26 (1.15, 1.37) | <0.0001 |
| College or above                                | 1.21 (1.09, 1.35) | 0.0003  | 1.13 (1.02, 1.26) | 0.019   | 1.13 (1.02, 1.26) | 0.024   |
| p for departure for a linear trend <sup>a</sup> | <0.0001           |         | <0.0001           |         | <0.0001           |         |
| Women                                           |                   |         |                   |         |                   |         |
| No formal school                                | 1                 |         | 1                 |         | 1                 |         |
| Primary school                                  | 1.19 (1.14, 1.24) | <0.0001 | 1.16 (1.11, 1.21) | <0.0001 | 1.16 (1.11, 1.22) | <0.0001 |
| Middle and high school                          | 0.97 (0.92, 1.03) | 0.32    | 1.00 (0.95, 1.05) | 0.90    | 1.11 (1.05, 1.17) | 0.0001  |
| College or above                                | 0.69 (0.63, 0.76) | <0.0001 | 0.76 (0.69, 0.84) | <0.0001 | 0.96 (0.87, 1.06) | 0.39    |
| p for departure for a linear trend <sup>a</sup> | <0.0001           |         | <0.0001           |         | <0.0001           |         |

Model 1: adjusted for age at baseline (continuous), study regions, family history of diabetes and household income.

Model 2: model 1 plus BMI (continuous).

Model 3: model 2 plus waist circumference, fat percentage, physical activity, regular alcohol consumption, active smoking, passive smoking, regular consumption of fish, regular consumption of fresh vegetable, regular consumption of fresh fruit, CHD, stroke or TIA, cancer, systolic blood pressure and diastolic blood pressure.

<sup>a</sup>Values $\geq$ 0.05 suggests that the trend is linear.

**ESM Table 4. Adjusted ORs and 95% CIs for baseline prevalent diabetes associated with household income in men and women**

| Household income (yuan/year)                    | Model 1           |         | Model 2           |         | Model 3           |         |
|-------------------------------------------------|-------------------|---------|-------------------|---------|-------------------|---------|
|                                                 | OR (95% CI)       | p       | OR (95% CI)       | p       | OR (95% CI)       | p       |
| Men                                             |                   |         |                   |         |                   |         |
| <10,000                                         | 1                 |         | 1                 |         | 1                 |         |
| 10,000-19,999                                   | 1.21 (1.13, 1.28) | <0.0001 | 1.13 (1.06, 1.20) | 0.0001  | 1.14 (1.07, 1.21) | <0.0001 |
| 20,000-34,999                                   | 1.26 (1.18, 1.35) | <0.0001 | 1.16 (1.08, 1.24) | <0.0001 | 1.18 (1.10, 1.26) | <0.0001 |
| ≥35,000                                         | 1.45 (1.34, 1.56) | <0.0001 | 1.27 (1.18, 1.37) | <0.0001 | 1.27 (1.17, 1.37) | <0.0001 |
| p for departure for a linear trend <sup>a</sup> | 0.01              |         | 0.12              |         | 0.12              |         |
| Women                                           |                   |         |                   |         |                   |         |
| <10,000                                         | 1                 |         | 1                 |         | 1                 |         |
| 10,000-19,999                                   | 1.16 (1.11, 1.22) | <0.0001 | 1.12 (1.07, 1.17) | <0.0001 | 1.14 (1.09, 1.19) | <0.0001 |
| 20,000-34,999                                   | 1.18 (1.12, 1.24) | <0.0001 | 1.14 (1.08, 1.20) | <0.0001 | 1.19 (1.13, 1.25) | <0.0001 |
| ≥35,000                                         | 1.26 (1.19, 1.34) | <0.0001 | 1.18 (1.11, 1.26) | <0.0001 | 1.27 (1.19, 1.35) | <0.0001 |
| p for departure for a linear trend <sup>a</sup> | 0.0003            |         | 0.011             |         | 0.032             |         |

Model 1: adjusted for age at baseline (continuous), study regions, family history of diabetes, educational level and household size.

Model 2: model 1 plus BMI (continuous).

Model 3: model 2 plus waist circumference, fat percentage, physical activity, regular alcohol consumption, active smoking, passive smoking, regular consumption of fish, regular consumption of fresh vegetable, regular consumption of fresh fruit, CHD, stroke or TIA, cancer, systolic blood pressure and diastolic blood pressure.

<sup>a</sup>Values≥0.05 suggests that the trend is linear.

**ESM Table 5. Sex specific characteristics of CKB participants included for prospective analyses**

| Variable                                   | Men (n=197736) | Women (n=282417) | All (n=480153) |
|--------------------------------------------|----------------|------------------|----------------|
| Age, years                                 | 52.1 (10.9)    | 50.5 (10.4)      | 51.1 (10.6)    |
| Urban residence, <i>n</i> (%)              | 83340 (42.1)   | 123233 (43.6)    | 206573 (43.0)  |
| Geographic area, <i>n</i> (%)              |                |                  |                |
| Eastern                                    | 68205 (34.5)   | 95879 (33.9)     | 164084 (34.2)  |
| Northeastern                               | 20563 (10.4)   | 30891 (10.9)     | 51454 (10.7)   |
| Central                                    | 52374 (26.5)   | 65391 (23.2)     | 117765 (24.5)  |
| Western                                    | 56594 (28.6)   | 90256 (32.0)     | 146850 (30.6)  |
| Educational level, <i>n</i> (%)            |                |                  |                |
| No formal school                           | 17666 (8.9)    | 70311 (24.9)     | 87977 (18.3)   |
| Primary school                             | 66325 (33.5)   | 88341 (31.3)     | 154666 (32.2)  |
| Middle or high school                      | 98619 (49.9)   | 111004 (39.3)    | 209623 (43.7)  |
| College or above                           | 15126 (7.6)    | 12761 (4.5)      | 27887 (5.8)    |
| Household income (yuan/year), <i>n</i> (%) |                |                  |                |
| <10,000                                    | 52154 (26.4)   | 84400 (29.9)     | 136554 (28.4)  |
| 10,000-19,999                              | 55935 (28.3)   | 83157 (29.4)     | 139092 (29.0)  |
| 20,000-34,999                              | 49991 (25.3)   | 68367 (24.2)     | 118358 (24.7)  |
| ≥35,000                                    | 39656 (20.1)   | 46493 (16.5)     | 86149 (17.9)   |
| Regular alcohol consumption, <i>n</i> (%)  | 88168 (44.6)   | 271177 (4.0)     | 359345 (74.8)  |
| Regular smoking, <i>n</i> (%)              |                |                  |                |
| Active                                     | 122017 (61.7)  | 6509 (2.3)       | 128526 (26.8)  |
| Passive                                    | 111131 (56.2)  | 148650 (52.6)    | 259781 (54.1)  |
| Regular consumption of foods, <i>n</i> (%) |                |                  |                |
| Fresh fruit                                | 45066 (22.8)   | 90100 (31.9)     | 135166 (28.2)  |
| Fresh vegetable                            | 194270 (98.2)  | 277621 (98.3)    | 471891 (98.3)  |
| Fish                                       | 18389 (9.3)    | 23819 (8.4)      | 42208 (8.8)    |
| Prior diseases, <i>n</i> (%)               |                |                  |                |
| CHD                                        | 4801 (2.4)     | 7866 (2.8)       | 12667 (2.6)    |
| Stroke or TIA                              | 4174 (2.1)     | 3107 (1.1)       | 7281 (1.5)     |
| Cancer                                     | 859 (0.43)     | 1412 (0.50)      | 2271 (0.47)    |
| Family history of diabetes, <i>n</i> (%)   | 8600 (4.3)     | 13355 (4.7)      | 21955 (4.6)    |
| BMI (kg/m <sup>2</sup> )                   |                |                  |                |
| Mean                                       | 23.4 (3.2)     | 23.7 (3.4)       | 23.6 (3.3)     |
| <24 (normal), <i>n</i> (%)                 | 117507 (59.4)  | 157613 (55.8)    | 275120 (57.3)  |
| 24-28 (overweight), <i>n</i> (%)           | 63597 (32.2)   | 93414 (33.1)     | 157011 (32.7)  |
| ≥28 (obese), <i>n</i> (%)                  | 16632 (8.4)    | 31390 (11.1)     | 48022 (10.0)   |
| Physical activity, Met-hr/day              | 22.4 (15.3)    | 20.8 (12.8)      | 21.5 (13.9)    |
| Systolic blood pressure, mm Hg             | 132 (19.8)     | 129.0 (21.6)     | 130.4 (20.9)   |
| Diastolic blood pressure, mm Hg            | 79.1 (11.3)    | 76.6 (10.8)      | 77.6 (11.1)    |
| Waist circumference, cm                    | 81.7 (9.6)     | 78.7 (9.3)       | 79.9 (9.6)     |
| Fat, %                                     | 21.9 (6.2)     | 31.9 (7.0)       | 27.8 (8.3)     |

Values are shown as *n* (%) or mean (SD).

**ESM Table 6. Sex specific characteristics of CKB participants included for prospective analyses by educational level**

| Variable                                   | Highest educational level attained |                             |                                    |                               |                               |                             |                                     |                               |
|--------------------------------------------|------------------------------------|-----------------------------|------------------------------------|-------------------------------|-------------------------------|-----------------------------|-------------------------------------|-------------------------------|
|                                            | Men (n=197736)                     |                             |                                    |                               | Women (n=282417)              |                             |                                     |                               |
|                                            | No formal school<br>(n=17666)      | Primary school<br>(n=66325) | Middle or high school<br>(n=98619) | College or above<br>(n=15126) | No formal school<br>(n=70311) | Primary school<br>(n=88341) | Middle or high school<br>(n=111004) | College or above<br>(n=12761) |
| Age, years                                 | 60.2 (9.9)                         | 55.7 (10.1)                 | 48.4 (9.7)                         | 50.2 (12.2)                   | 56.5 (10.1)                   | 51.4 (10.2)                 | 46.4 (8.5)                          | 46.1 (10.1)                   |
| Urban residence, <i>n</i> (%)              | 3307 (18.7)                        | 16317 (24.6)                | 50568 (51.3)                       | 13148 (86.9)                  | 20664 (29.4)                  | 24183 (27.4)                | 66679 (60.1)                        | 11707 (91.7)                  |
| Geographic area, <i>n</i> (%)              |                                    |                             |                                    |                               |                               |                             |                                     |                               |
| Eastern                                    | 9006 (51.0)                        | 21882 (33.0)                | 32802 (33.3)                       | 4515 (29.8)                   | 35081 (49.9)                  | 24654 (27.9)                | 33077 (29.8)                        | 3067 (24.0)                   |
| Northeastern                               | 268 (1.5)                          | 1507 (2.3)                  | 13040 (13.2)                       | 5748 (38.0)                   | 1715 (2.4)                    | 3330 (3.8)                  | 19723 (17.8)                        | 6123 (48.0)                   |
| Central                                    | 1762 (10.0)                        | 22879 (34.5)                | 26903 (27.3)                       | 830 (5.5)                     | 8639 (12.3)                   | 31920 (36.1)                | 24422 (22.0)                        | 410 (3.2)                     |
| Western                                    | 6630 (37.5)                        | 20057 (30.2)                | 25874 (26.2)                       | 4033 (26.7)                   | 24876 (35.4)                  | 28437 (32.2)                | 33782 (30.4)                        | 3161 (24.8)                   |
| Household income (yuan/year), <i>n</i> (%) |                                    |                             |                                    |                               |                               |                             |                                     |                               |
| <10,000                                    | 8446 (47.8)                        | 23426 (35.3)                | 19921 (20.2)                       | 361 (2.4)                     | 31267 (44.5)                  | 30342 (34.3)                | 22521 (20.3)                        | 270 (2.1)                     |
| 10,000-19,999                              | 3313 (18.8)                        | 18890 (28.5)                | 31592 (32.0)                       | 2140 (14.1)                   | 15403 (21.9)                  | 28534 (32.3)                | 37622 (33.9)                        | 1598 (12.5)                   |
| 20,000-34,999                              | 3378 (19.1)                        | 14010 (21.1)                | 27739 (28.1)                       | 4864 (32.2)                   | 13427 (19.1)                  | 19097 (21.6)                | 31528 (28.4)                        | 4315 (33.8)                   |
| ≥35,000                                    | 2529 (14.3)                        | 9999 (15.1)                 | 19367 (19.6)                       | 7761 (51.3)                   | 10214 (14.5)                  | 10368 (11.7)                | 19333 (17.4)                        | 6578 (51.5)                   |
| Regular alcohol consumption, <i>n</i> (%)  | 6201 (35.1)                        | 27804 (41.9)                | 46789 (47.4)                       | 7374 (48.8)                   | 1992 (2.8)                    | 3187 (3.6)                  | 4904 (4.4)                          | 1157 (9.1)                    |
| Regular smoking, <i>n</i> (%)              |                                    |                             |                                    |                               |                               |                             |                                     |                               |
| Active                                     | 11472 (64.9)                       | 43398 (65.4)                | 61001 (61.9)                       | 6146 (40.6)                   | 2162 (3.1)                    | 2641 (3.0)                  | 1619 (1.5)                          | 87 (0.7)                      |
| Passive                                    | 8282 (46.9)                        | 37379 (56.4)                | 58214 (59.0)                       | 7256 (48.0)                   | 32710 (46.5)                  | 50093 (56.7)                | 60427 (54.4)                        | 5420 (42.5)                   |
| Regular consumption of foods, <i>n</i> (%) |                                    |                             |                                    |                               |                               |                             |                                     |                               |
| Fresh fruit                                | 2106 (11.9)                        | 9090 (13.7)                 | 25870 (26.2)                       | 8000 (52.9)                   | 10781 (15.3)                  | 18273 (20.7)                | 50924 (45.9)                        | 10122 (79.3)                  |
| Fresh vegetable                            | 16854 (95.4)                       | 65226 (98.3)                | 97176 (98.5)                       | 15014 (99.3)                  | 67709 (96.3)                  | 87140 (98.6)                | 110081 (99.2)                       | 12691 (99.5)                  |



|                                          |              |              |              |              |  |              |              |              |              |
|------------------------------------------|--------------|--------------|--------------|--------------|--|--------------|--------------|--------------|--------------|
| Fish                                     | 849 (4.8)    | 4129 (6.2)   | 10961 (11.1) | 2450 (16.2)  |  | 4367 (6.2)   | 5648 (6.4)   | 12080 (10.9) | 1724 (13.5)  |
| Prior diseases, <i>n</i> (%)             |              |              |              |              |  |              |              |              |              |
| CHD                                      | 331 (1.9)    | 1570 (2.4)   | 2140 (2.2)   | 760 (5.0)    |  | 1624 (2.3)   | 2527 (2.9)   | 3113 (2.8)   | 602 (4.7)    |
| Stroke or TIA                            | 421 (2.4)    | 1466 (2.2)   | 1883 (1.9)   | 404 (2.7)    |  | 839 (1.2)    | 1042 (1.2)   | 1076 (1.0)   | 150 (1.2)    |
| Cancer                                   | 95 (0.54)    | 348 (0.52)   | 339 (0.34)   | 77 (0.51)    |  | 310 (0.44)   | 461 (0.52)   | 537 (0.48)   | 104 (0.82)   |
| Family history of diabetes, <i>n</i> (%) | 219 (1.2)    | 1325 (2.0)   | 5759 (5.8)   | 1297 (8.6)   |  | 1087 (1.5)   | 2244 (2.5)   | 8292 (7.5)   | 1732 (13.6)  |
| BMI (kg/m <sup>2</sup> )                 |              |              |              |              |  |              |              |              |              |
| Mean                                     | 22.2 (3.0)   | 22.8 (3.1)   | 23.7 (3.2)   | 24.6 (3.1)   |  | 23.6 (3.5)   | 23.8 (3.5)   | 23.8 (3.3)   | 23.2 (3.0)   |
| <24 (normal), <i>n</i> (%)               | 13077 (74.1) | 44628 (67.3) | 53633 (54.4) | 6169 (40.8)  |  | 39981 (56.9) | 48507 (54.9) | 61058 (55.0) | 8067 (63.2)  |
| 24-28 (overweight), <i>n</i> (%)         | 3875 (21.9)  | 17818 (26.9) | 35005 (35.5) | 6899 (45.6)  |  | 22527 (32.0) | 29407 (33.3) | 37706 (34.0) | 3774 (29.6)  |
| ≥28 (obese), <i>n</i> (%)                | 714 (4.0)    | 3879 (5.8)   | 9981 (10.1)  | 2058 (13.6)  |  | 7803 (11.1)  | 10427 (11.8) | 12240 (11.0) | 920 (7.2)    |
| Physical activity, Met-hr/day            | 24.0 (16.3)  | 22.5 (16.0)  | 23.0 (15.2)  | 15.9 (9.2)   |  | 22.4 (13.8)  | 20.6 (13.0)  | 20.3 (12.4)  | 18.1 (8.0)   |
| Systolic blood pressure, mm Hg           | 138.2 (22.4) | 134.3 (20.7) | 130.5 (18.6) | 129.1 (18.0) |  | 137.0 (23.2) | 131.2 (21.4) | 123.6 (18.8) | 116.9 (17.5) |
| Diastolic blood pressure, mm Hg          | 79.8 (11.5)  | 78.8 (11.3)  | 79.1 (11.3)  | 78.9 (11.0)  |  | 78.4 (11.1)  | 77.1 (10.8)  | 75.5 (10.5)  | 73.0 (10.1)  |
| Waist circumference, cm                  | 77.8 (9.1)   | 79.7 (9.3)   | 83.1 (9.5)   | 86.3 (8.8)   |  | 79.1 (10.0)  | 79.3 (9.6)   | 78.2 (8.8)   | 76.3 (8.2)   |
| Fat, %                                   | 19.3 (6.0)   | 20.6 (6.0)   | 22.8 (6.1)   | 24.1 (5.7)   |  | 31.5 (7.4)   | 32.2 (7.2)   | 32.1 (6.7)   | 30.8 (6.1)   |

Values are shown as *n* (%) or mean (SD).

**ESM Table 7. Sex specific characteristics of CKB participants included for prospective analyses by household income**

| Variable                                   | Household income (yuan/year) |                          |                          |                     |                     |                          |                          |                     |
|--------------------------------------------|------------------------------|--------------------------|--------------------------|---------------------|---------------------|--------------------------|--------------------------|---------------------|
|                                            | Men (n=197736)               |                          |                          |                     | Women (n=282417)    |                          |                          |                     |
|                                            | <10000<br>(n=52154)          | 10000-19999<br>(n=55935) | 20000-34999<br>(n=49991) | ≥35000<br>(n=39656) | <10000<br>(n=84400) | 10000-19999<br>(n=83157) | 20000-34999<br>(n=68367) | ≥35000<br>(n=46493) |
| Age, years                                 | 54.2 (11.4)                  | 51.9 (10.8)              | 51.2 (10.4)              | 50.6 (10.4)         | 51.7 (11.3)         | 50.2 (10.2)              | 49.7 (9.7)               | 49.8 (9.7)          |
| Urban residence, <i>n</i> (%)              | 8923 (17.1)                  | 22751 (40.7)             | 27555 (55.1)             | 24111 (60.8)        | 18926 (22.4)        | 36969 (44.5)             | 38580 (56.4)             | 28758 (61.9)        |
| Geographic area, <i>n</i> (%)              |                              |                          |                          |                     |                     |                          |                          |                     |
| Eastern                                    | 6423 (12.3)                  | 13157 (23.5)             | 24386 (48.8)             | 24239 (61.1)        | 11733 (13.9)        | 20663 (24.8)             | 34176 (50.0)             | 29307 (63.0)        |
| Northeastern                               | 1873 (3.6)                   | 6720 (12.0)              | 6850 (13.7)              | 5120 (12.9)         | 4544 (5.4)          | 10453 (12.6)             | 9410 (13.8)              | 6484 (13.9)         |
| Central                                    | 15523 (29.8)                 | 20154 (36.0)             | 11361 (22.7)             | 5336 (13.5)         | 18813 (22.3)        | 26845 (32.3)             | 14243 (20.8)             | 5490 (11.8)         |
| Western                                    | 28335 (54.3)                 | 15904 (28.4)             | 7394 (14.8)              | 4961 (12.5)         | 49310 (58.4)        | 25196 (30.3)             | 10538 (15.4)             | 5212 (11.2)         |
| Highest educational level, <i>n</i> (%)    |                              |                          |                          |                     |                     |                          |                          |                     |
| No formal school                           | 8446 (16.2)                  | 3313 (5.9)               | 3378 (6.8)               | 2529 (6.4)          | 31267 (37.0)        | 15403 (18.5)             | 13427 (19.6)             | 10214 (22.0)        |
| Primary school                             | 23426 (44.9)                 | 18890 (33.8)             | 14010 (28.0)             | 9999 (25.2)         | 30342 (36.0)        | 28534 (34.3)             | 19097 (27.9)             | 10368 (22.3)        |
| Middle or high school                      | 19921 (38.2)                 | 31592 (56.5)             | 27739 (55.5)             | 19367 (48.8)        | 22521 (26.7)        | 37622 (45.2)             | 31528 (46.1)             | 19333 (41.6)        |
| College or above                           | 361 (0.7)                    | 2140 (3.8)               | 4864 (9.7)               | 7761 (19.6)         | 270 (0.32)          | 1598 (1.9)               | 4315 (6.3)               | 6578 (14.1)         |
| Regular alcohol consumption, <i>n</i> (%)  | 19070 (36.6)                 | 25162 (45.0)             | 24111 (48.2)             | 19825 (50.0)        | 3296 (3.9)          | 3082 (3.7)               | 2707 (4.0)               | 2155 (4.6)          |
| Regular smoking, <i>n</i> (%)              |                              |                          |                          |                     |                     |                          |                          |                     |
| Active                                     | 33914 (65.0)                 | 34038 (60.9)             | 30230 (60.5)             | 23835 (60.1)        | 3277 (3.9)          | 1895 (2.3)               | 859 (1.3)                | 478 (1.0)           |
| Passive                                    | 26502 (50.8)                 | 31716 (56.7)             | 28995 (58.0)             | 23918 (60.3)        | 45154 (53.5)        | 45212 (54.4)             | 35147 (51.4)             | 23137 (49.8)        |
| Regular consumption of foods, <i>n</i> (%) |                              |                          |                          |                     |                     |                          |                          |                     |
| Fresh fruit                                | 5923 (11.4)                  | 11628 (20.8)             | 14054 (28.1)             | 13461 (33.9)        | 13986 (16.6)        | 26136 (31.4)             | 27521 (40.3)             | 22457 (48.3)        |
| Fresh vegetable                            | 50033 (95.9)                 | 55289 (98.8)             | 49584 (99.2)             | 39364 (99.3)        | 81002 (96.0)        | 82435 (99.1)             | 67924 (99.4)             | 46260 (99.5)        |
| Fish                                       | 1799 (3.4)                   | 4185 (7.5)               | 5824 (11.7)              | 6581 (16.6)         | 3114 (3.7)          | 6117 (7.4)               | 7193 (10.5)              | 7395 (15.9)         |

|                                          |              |              |              |              |  |              |              |              |              |
|------------------------------------------|--------------|--------------|--------------|--------------|--|--------------|--------------|--------------|--------------|
| Prior diseases, <i>n</i> (%)             |              |              |              |              |  |              |              |              |              |
| CHD                                      | 986 (1.9)    | 1513 (2.7)   | 1366 (2.7)   | 936 (2.4)    |  | 1970 (2.3)   | 2571 (3.1)   | 2019 (3.0)   | 1306 (2.8)   |
| Stroke or TIA                            | 1263 (2.4)   | 1347 (2.4)   | 978 (2.0)    | 586 (1.5)    |  | 1009 (1.2)   | 1020 (1.2)   | 656 (1.0)    | 422 (0.9)    |
| Cancer                                   | 273 (0.52)   | 237 (0.42)   | 189 (0.38)   | 160 (0.40)   |  | 400 (0.47)   | 441 (0.53)   | 358 (0.52)   | 213 (0.46)   |
| Family history of diabetes, <i>n</i> (%) | 1283 (2.5)   | 2373 (4.2)   | 2671 (5.3)   | 2273 (5.7)   |  | 2243 (2.7)   | 3967 (4.8)   | 4052 (5.9)   | 3093 (6.7)   |
| BMI (kg/m <sup>2</sup> )                 |              |              |              |              |  |              |              |              |              |
| Mean                                     | 22.5 (3.0)   | 23.4 (3.2)   | 23.7 (3.2)   | 24.1 (3.2)   |  | 23.5 (3.5)   | 23.9 (3.5)   | 23.7 (3.3)   | 23.7 (3.2)   |
| <24 (normal), <i>n</i> (%)               | 37138 (71.2) | 33462 (59.8) | 27379 (54.8) | 19528 (49.2) |  | 48891 (57.9) | 44597 (53.6) | 38234 (55.9) | 25891 (55.7) |
| 24-28 (overweight), <i>n</i> (%)         | 12450 (23.9) | 17679 (31.6) | 17797 (35.6) | 15671 (39.5) |  | 26395 (31.3) | 28263 (34.0) | 22914 (33.5) | 15842 (34.1) |
| ≥28 (obese), <i>n</i> (%)                | 2566 (4.9)   | 4794 (8.6)   | 4815 (9.6)   | 4457 (11.2)  |  | 9114 (10.8)  | 10297 (12.4) | 7219 (10.6)  | 4760 (10.2)  |
| Physical activity, Met-hr/day            | 22.0 (16.2)  | 21.6 (15.7)  | 23.4 (14.8)  | 22.8 (14.1)  |  | 20.7 (12.4)  | 19.3 (12.3)  | 21.9 (13.5)  | 21.9 (13.1)  |
| Systolic blood pressure, mm Hg           | 133.3 (21.1) | 131.9 (19.7) | 132.2 (19.3) | 131.9 (18.8) |  | 131.2 (22.6) | 128.5 (21.4) | 128.1 (20.9) | 127.3 (20.6) |
| Diastolic blood pressure, mm Hg          | 78.4 (11.4)  | 78.7 (11.4)  | 79.4 (11.2)  | 80.0 (11.1)  |  | 76.8 (11.1)  | 76.5 (10.9)  | 76.6 (10.7)  | 76.5 (10.5)  |
| Waist circumference, cm                  | 79.2 (9.0)   | 81.8 (9.7)   | 82.6 (9.7)   | 83.8 (9.6)   |  | 78.6 (9.6)   | 79.1 (9.5)   | 78.4 (9.1)   | 78.5 (8.8)   |
| Fat, %                                   | 20.1 (6.0)   | 21.8 (6.1)   | 22.5 (6.1)   | 23.4 (6.1)   |  | 31.5 (7.3)   | 32.3 (7.1)   | 31.9 (6.8)   | 32.0 (6.7)   |

Values are shown as *n* (%) or mean (SD).

**ESM Table 8. Adjusted HRs and 95% CIs for incident diabetes associated with educational level in men and women**

| Educational level                               | Model 1           |         | Model 2           |         | Model 3           |         |
|-------------------------------------------------|-------------------|---------|-------------------|---------|-------------------|---------|
|                                                 | HR (95% CI)       | p       | HR (95% CI)       | p       | HR (95% CI)       | p       |
| Men                                             |                   |         |                   |         |                   |         |
| No formal school                                | 1                 |         | 1                 |         | 1                 |         |
| Primary school                                  | 1.01 (0.90, 1.13) | 0.84    | 0.97 (0.87, 1.08) | 0.56    | 0.94 (0.84, 1.05) | 0.26    |
| Middle and high school                          | 1.08 (0.96, 1.23) | 0.21    | 1.00 (0.88, 1.13) | 0.95    | 0.94 (0.83, 1.07) | 0.36    |
| College or above                                | 1.27 (1.07, 1.51) | 0.0076  | 1.15 (0.97, 1.37) | 0.12    | 1.11 (0.93, 1.32) | 0.24    |
| p for departure for a linear trend <sup>a</sup> | 0.26              |         | 0.13              |         | 0.035             |         |
|                                                 |                   |         |                   |         |                   |         |
| Women                                           |                   |         |                   |         |                   |         |
| No formal school                                | 1                 |         | 1                 |         | 1                 |         |
| Primary school                                  | 0.95 (0.89, 1.02) | 0.18    | 0.94 (0.87, 1.00) | 0.066   | 0.94 (0.87, 1.01) | 0.075   |
| Middle and high school                          | 0.79 (0.72, 0.87) | <0.0001 | 0.82 (0.75, 0.90) | <0.0001 | 0.85 (0.78, 0.94) | 0.00062 |
| College or above                                | 0.80 (0.67, 0.95) | 0.010   | 0.91 (0.76, 1.09) | 0.30    | 0.99 (0.83, 1.19) | 0.92    |
| p for departure for a linear trend <sup>a</sup> | 0.047             |         | 0.072             |         | 0.042             |         |

Model 1: stratified by age at baseline (5-year age group) and study regions, and adjusted for age at baseline (continuous), family history of diabetes and household income.

Model 2: model 1 plus BMI (continuous).

Model 3: model 2 plus waist circumference, fat percentage, physical activity, regular alcohol consumption, active smoking, passive smoking, regular consumption of fish, regular consumption of fresh vegetable, regular consumption of fresh fruit, CHD, stroke or TIA, cancer, systolic blood pressure and diastolic blood pressure.

<sup>a</sup>Values $\geq$ 0.05 suggests that the trend is linear.

**ESM Table 9. Adjusted HRs and 95% CIs for incident diabetes associated with household income in men and women**

| Household income (yuan/year)                    | Model 1           |         | Model 2           |      | Model 3           |      |
|-------------------------------------------------|-------------------|---------|-------------------|------|-------------------|------|
|                                                 | HR (95% CI)       | p       | HR (95% CI)       | p    | HR (95% CI)       | p    |
| Men                                             |                   |         |                   |      |                   |      |
| <10,000                                         | 1                 |         | 1                 |      | 1                 |      |
| 10,000-19,999                                   | 1.03 (0.92, 1.15) | 0.64    | 0.93 (0.83, 1.04) | 0.18 | 0.92 (0.82, 1.03) | 0.14 |
| 20,000-34,999                                   | 1.13 (1.00, 1.28) | 0.05    | 0.98 (0.87, 1.11) | 0.78 | 0.96 (0.85, 1.08) | 0.48 |
| ≥35,000                                         | 1.36 (1.19, 1.55) | <0.0001 | 1.07 (0.94, 1.22) | 0.30 | 1.01 (0.88, 1.16) | 0.87 |
| p for departure for a linear trend <sup>a</sup> | 0.092             |         | 0.066             |      | 0.14              |      |
| Women                                           |                   |         |                   |      |                   |      |
| <10,000                                         | 1                 |         | 1                 |      | 1                 |      |
| 10,000-19,999                                   | 1.03 (0.95, 1.12) | 0.48    | 0.99 (0.91, 1.07) | 0.75 | 1.00 (0.92, 1.08) | 0.92 |
| 20,000-34,999                                   | 1.06 (0.96, 1.16) | 0.24    | 1.00 (0.92, 1.10) | 0.92 | 1.01 (0.92, 1.11) | 0.88 |
| ≥35,000                                         | 1.06 (0.95, 1.17) | 0.28    | 0.97 (0.87, 1.07) | 0.55 | 0.96 (0.87, 1.07) | 0.50 |
| p for departure for a linear trend <sup>a</sup> | 0.87              |         | 0.69              |      | 0.64              |      |

Model 1: stratified by age at baseline (5-year age group) and study regions, and adjusted for age at baseline (continuous), family history of diabetes, educational level and household size.

Model 2: model 1 plus BMI (continuous).

Model 3: model 2 plus waist circumference, fat percentage, physical activity, regular alcohol consumption, active smoking, passive smoking, regular consumption of fish, regular consumption of fresh vegetable, regular consumption of fresh fruit, CHD, stroke or TIA, cancer, systolic blood pressure and diastolic blood pressure.

<sup>a</sup>Values≥0.05 suggests that the trend is linear.

**ESM Table 10. Sex specific incidence and HRs (95% CIs) for incident diabetes associated with composite measure of educational level and household income**

| Composite measure of SES       | No. of events | Crude incidence rate<br>(no./1000 person-years) | Standardised <sup>a</sup> incidence rate<br>(no./1000 person-years) | HR (95% CI) <sup>b</sup> | p       |
|--------------------------------|---------------|-------------------------------------------------|---------------------------------------------------------------------|--------------------------|---------|
| Men                            |               |                                                 |                                                                     |                          |         |
| Low education and low income   | 925           | 2.44 (2.29, 2.61)                               | 2.06 (1.91, 2.22)                                                   | 1                        |         |
| Low education and high income  | 897           | 4.35 (4.07, 4.64)                               | 4.01 (3.72, 4.37)                                                   | 1.15 (1.02, 1.29)        | 0.020   |
| High education and low income  | 657           | 1.67 (1.55, 1.80)                               | 1.95 (1.79, 2.11)                                                   | 1.04 (0.93, 1.17)        | 0.47    |
| High education and high income | 1128          | 2.72 (2.56, 2.88)                               | 3.04 (2.86, 3.24)                                                   | 1.33 (1.20, 1.48)        | <0.0001 |
| Women                          |               |                                                 |                                                                     |                          |         |
| Low education and low income   | 2326          | 3.04 (2.92, 3.17)                               | 2.58 (2.47, 2.70)                                                   | 1                        |         |
| Low education and high income  | 1949          | 5.19 (4.97, 5.43)                               | 7.10 (6.58, 7.67)                                                   | 1.03 (0.95, 1.11)        | 0.48    |
| High education and low income  | 732           | 1.60 (1.49, 1.72)                               | 2.43 (2.21, 2.68)                                                   | 0.82 (0.75, 0.91)        | 0.0001  |
| High education and high income | 930           | 2.16 (2.02, 2.30)                               | 2.52 (2.35, 2.70)                                                   | 0.86 (0.78, 0.94)        | 0.0013  |

<sup>a</sup>5-year age group standardised to the whole CKB population.

<sup>b</sup>Stratified by age at baseline (5-year age group) and study regions, and adjusted for age at baseline (continuous), family history of diabetes and household size.

**ESM Table 11. Adjusted ORs (95% CIs) for baseline prevalent diabetes and HRs (95% CIs) for incident diabetes associated with educational level in men and women without any CHD, stroke or TIA, or cancer at baseline**

| <b>Educational level</b>                        | <b>OR (95% CI)</b> | <b>p</b> | <b>HR (95% CI)</b> | <b>p</b> |
|-------------------------------------------------|--------------------|----------|--------------------|----------|
| Men                                             |                    |          |                    |          |
| No formal school                                | 1                  |          | 1                  |          |
| Primary school                                  | 1.24 (1.14, 1.35)  | <0.0001  | 1.01 (0.90, 1.14)  | 0.83     |
| Middle and high school                          | 1.36 (1.25, 1.49)  | <0.0001  | 1.09 (0.96, 1.24)  | 0.21     |
| College or above                                | 1.20 (1.07, 1.34)  | 0.0017   | 1.30 (1.08, 1.56)  | 0.0062   |
| p for departure for a linear trend <sup>a</sup> | <0.0001            |          | 0.22               |          |
| Women                                           |                    |          |                    |          |
| No formal school                                | 1                  |          | 1                  |          |
| Primary school                                  | 1.17 (1.12, 1.22)  | <0.0001  | 0.94 (0.87, 1.01)  | 0.082    |
| Middle and high school                          | 0.94 (0.89, 1.00)  | 0.035    | 0.78 (0.71, 0.86)  | <0.0001  |
| College or above                                | 0.65 (0.58, 0.72)  | <0.0001  | 0.77 (0.63, 0.93)  | 0.0083   |
| p for departure for a linear trend <sup>a</sup> | <0.0001            |          | 0.12               |          |

Logistic regression models were adjusted for age at baseline (continuous), study regions, family history of diabetes and household income.

Cox regression models were stratified by age at baseline (5-year age group) and study regions, and adjusted for age at baseline (continuous), family history of diabetes and household income.

<sup>a</sup>Values $\geq$ 0.05 suggests that the trend is linear.

**ESM Table 12. Adjusted ORs (95% CIs) for baseline prevalent diabetes and HRs (95% CIs) for incident diabetes associated with household income in men and women without any CHD, stroke or TIA, or cancer at baseline**

| Household income (yuan/year)                    | OR (95% CI)       | p       | HR (95% CI)       | p       |
|-------------------------------------------------|-------------------|---------|-------------------|---------|
| Men                                             |                   |         |                   |         |
| <10,000                                         | 1                 |         | 1                 |         |
| 10,000-19,999                                   | 1.20 (1.12, 1.28) | <0.0001 | 1.01 (0.90, 1.14) | 0.85    |
| 20,000-34,999                                   | 1.27 (1.18, 1.37) | <0.0001 | 1.11 (0.97, 1.26) | 0.12    |
| ≥35,000                                         | 1.44 (1.33, 1.56) | <0.0001 | 1.33 (1.16, 1.53) | <0.0001 |
| p for departure for a linear trend <sup>a</sup> | 0.068             |         | 0.064             |         |
| Women                                           |                   |         |                   |         |
| <10,000                                         | 1                 |         | 1                 |         |
| 10,000-19,999                                   | 1.16 (1.10, 1.21) | <0.0001 | 1.02 (0.93, 1.11) | 0.73    |
| 20,000-34,999                                   | 1.20 (1.13, 1.27) | <0.0001 | 1.05 (0.95, 1.15) | 0.36    |
| ≥35,000                                         | 1.28 (1.20, 1.36) | <0.0001 | 1.07 (0.96, 1.19) | 0.22    |
| p for departure for a linear trend <sup>a</sup> | 0.0089            |         | 0.98              |         |

Logistic regression models were adjusted for age at baseline (continuous), study regions, family history of diabetes, educational level and household size.

Cox regression models were stratified by age at baseline (5-year age group) and study regions, and adjusted for age at baseline (continuous), family history of diabetes, educational level and household size.

<sup>a</sup>Values≥0.05 suggests that the trend is linear.



**ESM Fig. 1. Flowchart for selection of participants included in the analyses**

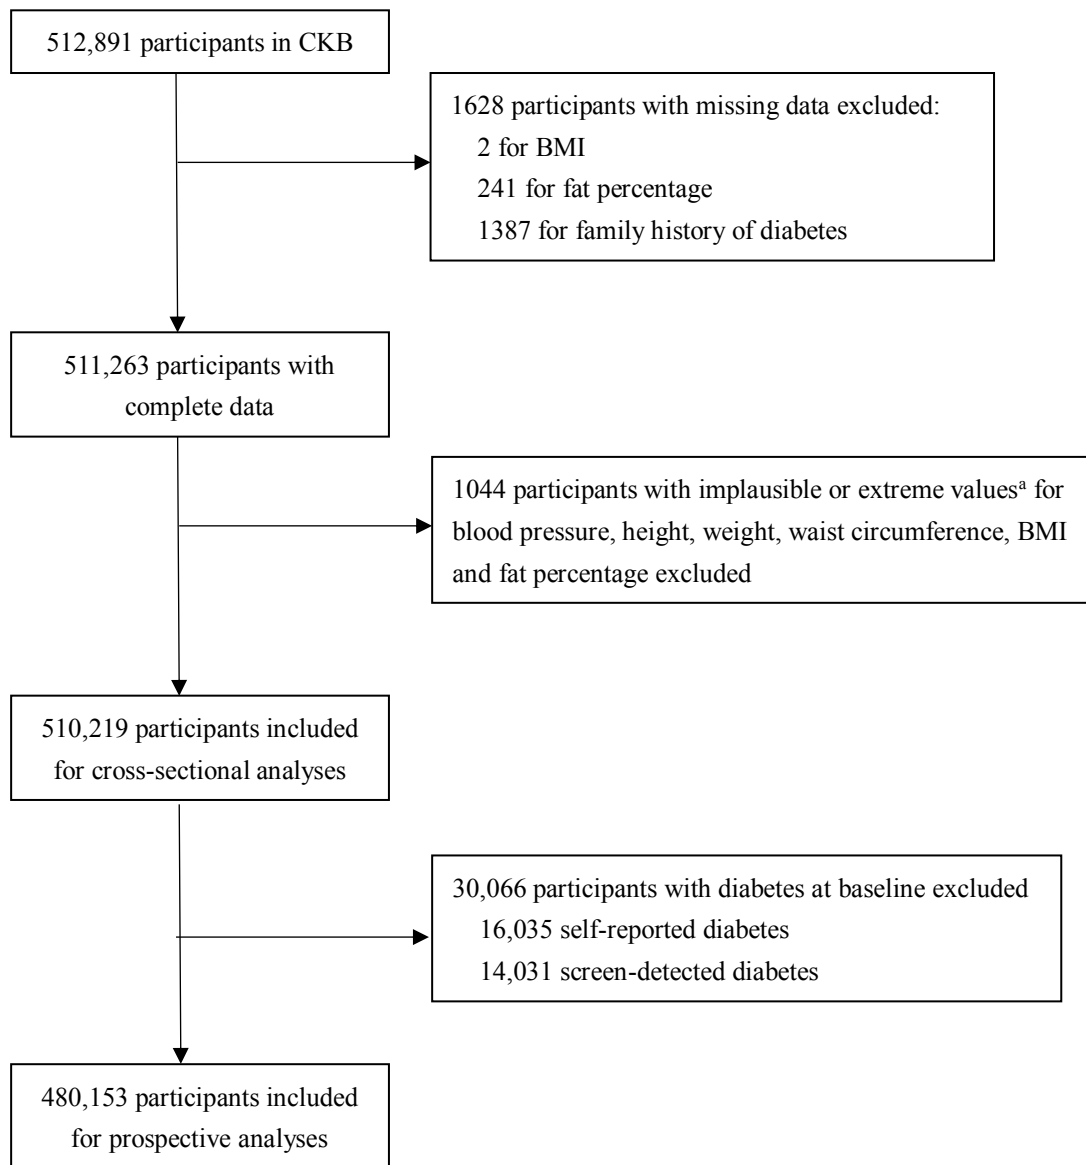

<sup>a</sup>Values out of 0.01 and 99.99 percentiles of the distribution.

**ESM Fig. 2: Adjusted HRs and 95% CIs for incident diabetes comparing those with the highest versus lowest educational level in men and women according to baseline characteristics**

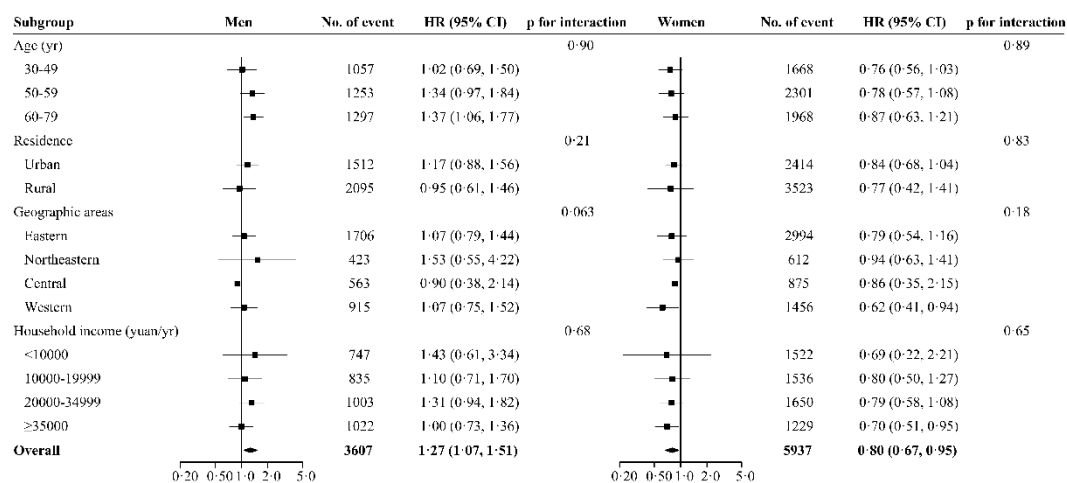

Cox models were stratified by age at baseline (5-year age group) and study regions, and adjusted for age at baseline (continuous), family history of diabetes and household income as appropriate.

**ESM Fig. 3: Adjusted HRs and 95% CIs for incident diabetes comparing those with the highest versus lowest household income in men and women according to baseline characteristics**

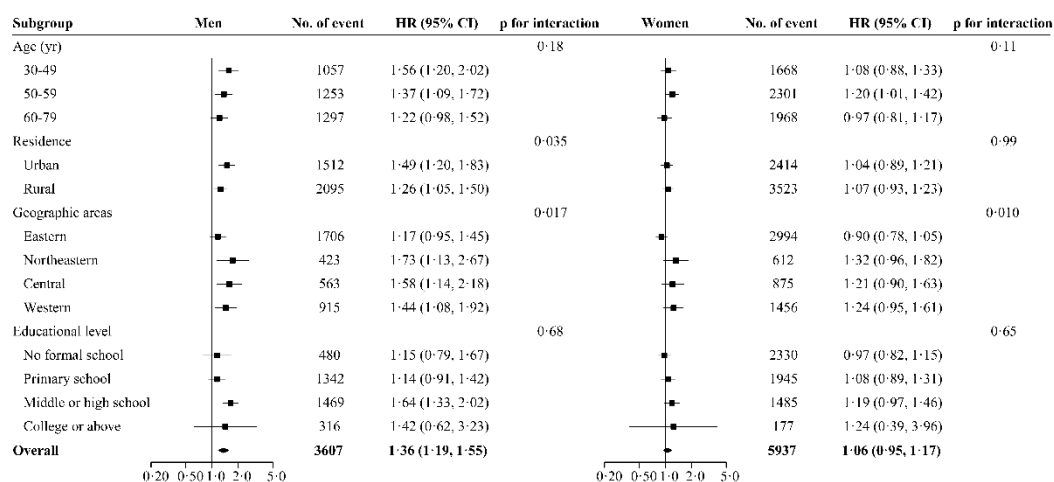

Cox models were stratified by age at baseline (5-year age group) and study regions, and adjusted for age at baseline (continuous), family history of diabetes, household size and educational level as appropriate.
